# Supplementary material
Source: publisher site journal article supplement (https://www.spandidos-publications.com/5665/downloadSupplementary)
Supplement: Supplementary file 1 [file downloadSupplementary]

## Sheet: Sheet1
Table SI. Copy number amplification was detected in osimertinib-resistant and -sensitive cell lines.
Sample ID	Type	Gene	Copy number
HCC827	CNV	EGFR	18.99
HCC827	CNV	CDK4	14.75
HCC827	CNV	MYC	3.96
HCC827-OR	CNV	EGFR	7.18
HCC827-OR	CNV	CDK4	17.56
HCC827-OR	CNV	MYC	4.16
HCC827-OR	CNV	SMAD4	0.41
H1975	CNV	MYC	19.48
H1975-OR	CNV	AKT1	2.24
H1975-OR	CNV	MYC	26.22
H1975-OR	CNV	CDK6	2.29
CNV, copy number variation.
